# Supplementary material
Source: PubMed Central journal article supplement (PMC4428051)

Figure S3B-X

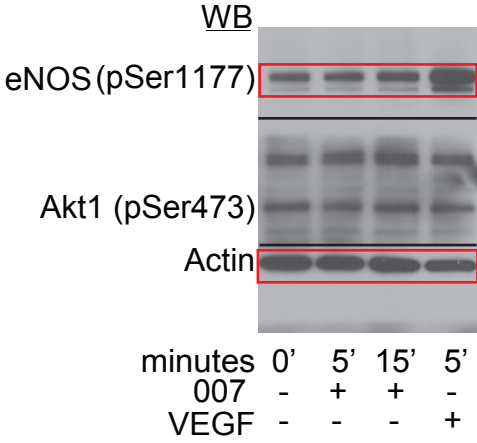

Supplement: embr0016-0628-sd2.pdf [file embr0016-0628-sd2.pdf]
